# Supplementary material for: Vanadia supported on mesoporous carbon nitride as a highly efficient catalyst for hydroxylation of benzene to phenol
Source: Royal Society of Chemistry journal article supplement (doi:10.1039/c4cy01373e), 2014-11-26
Supplement: c4cy01373e1.pdf [file c4cy01373e1.pdf]

# Supporting Information for

## Vanadia Supported on Mesoporous Carbon Nitride as a Highly Efficient Catalyst for Hydroxylation of Benzene to Phenol

Jie Xu \*, Quan Jiang, Ting Chen, Fei Wu, Yong-Xin Li \*

*Jiangsu Key Laboratory of Advanced Catalytic Materials and Technology, School of  
Petrochemical Engineering, Changzhou University, Gehu Road 1, Changzhou,  
Jiangsu 213164, PR China*

### Determination of the data of catalytic conversion and selectivity

All the reagents and products are analyzed by GC equipped by a FID detector coupled with a SE-54 capillary column. After a catalytic reaction, the resultant compounds revealed by the GC profile were only CH<sub>3</sub>CN (solvent), benzene, phenol, and benzoquinone. No biphenyl, catechol, or hydroquinone was detected. Their quantitative calculation (i.e. conversion of benzene, and selectivity to phenol) was based on an area-normalization method.

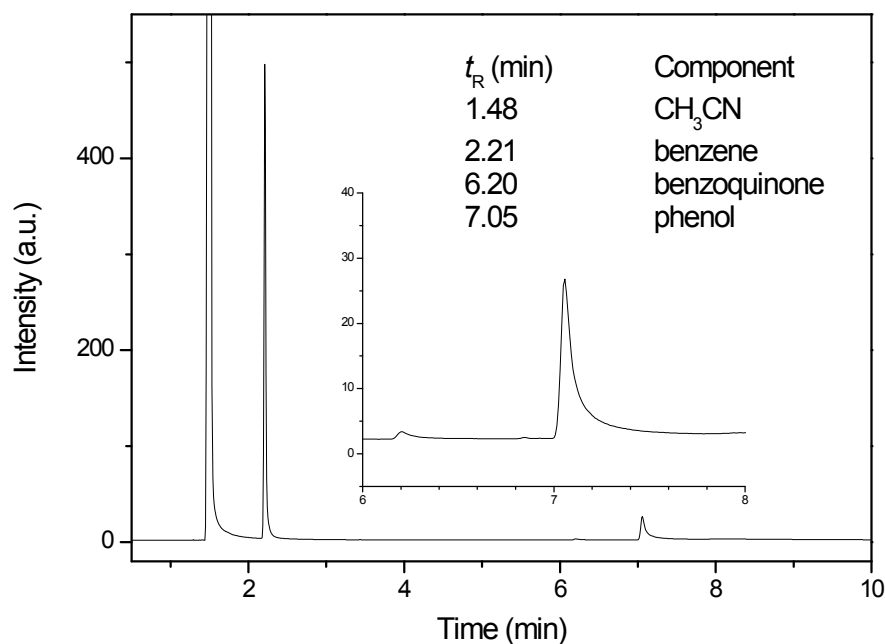

**Fig. S1** A representative GC profile after the catalytic reaction.

A series of CH<sub>3</sub>CN solutions containing benzene, phenol and benzoquinone with different concentrations were prepared. Wherein, the concentrations for the three solutes were close to ordinary values in a typical catalytic reaction of the present work. Next, the response factors (*f*) for phenol and benzoquinone on the basis of benzene were calculated as follows:

$$f_{\text{phenol}} = \frac{A_{\text{benzene}} / n_{\text{benzene}}}{A_{\text{phenol}} / n_{\text{phenol}}}, f_{\text{benzoquinone}} = \frac{A_{\text{benzene}} / n_{\text{benzene}}}{A_{\text{benzoquinone}} / n_{\text{benzoquinone}}}$$

where *A*, and *n* were the peak area of GC, and molar amount (or concentration, mol/L) of a compound, respectively.

The final conversion of benzene (*Conv.*) and selectivity to phenol (*Sel.*) were calculated as follows:

$$Conv. = \frac{A_{\text{phenol}} \times f_{\text{phenol}} + A_{\text{benzoquinone}} \times f_{\text{benzoquinone}}}{A_{\text{benzene}} + A_{\text{phenol}} \times f_{\text{phenol}} + A_{\text{benzoquinone}} \times f_{\text{benzoquinone}}}$$

$$Sel. = \frac{A_{\text{phenol}} \times f_{\text{phenol}}}{A_{\text{phenol}} \times f_{\text{phenol}} + A_{\text{benzoquinone}} \times f_{\text{benzoquinone}}}$$

The efficiency (*E*<sub>H<sub>2</sub>O<sub>2</sub></sub> or selective conversion) of H<sub>2</sub>O<sub>2</sub> for the hydroxylation of benzene was calculated as follows:

$$E_{\text{H}_2\text{O}_2} = \frac{n_{\text{phenol}} + 2n_{\text{benzoquinone}}}{n_{\text{H}_2\text{O}_2, \text{feed}}} = \frac{n_{\text{benzene, feed}} \times Conv. \times Sel. + 2n_{\text{benzene, feed}} \times Conv. \times (1 - Sel.)}{n_{\text{H}_2\text{O}_2, \text{feed}}}$$

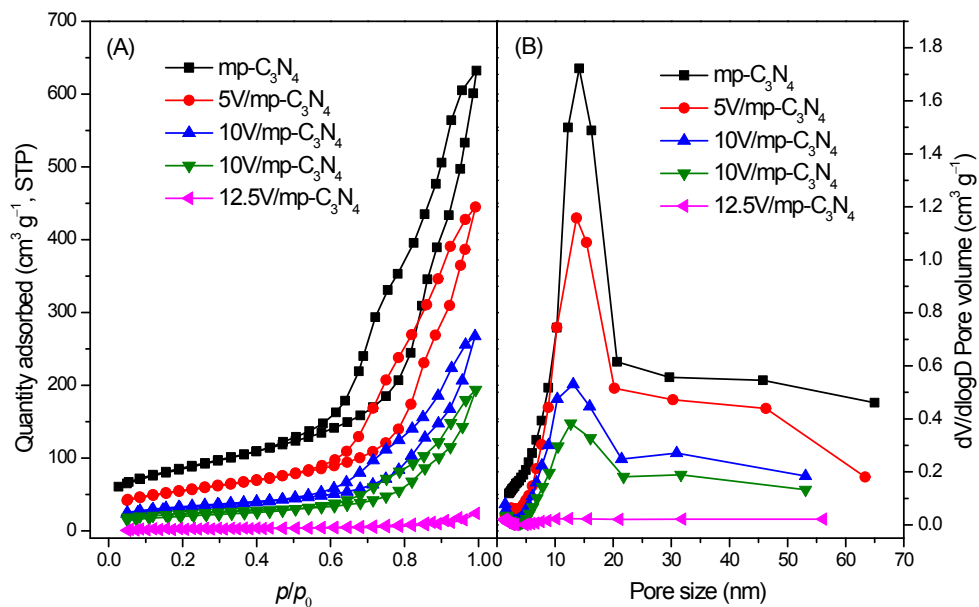

**Fig. S2**  $\text{N}_2$  adsorption–desorption isotherms (A) and pore size distributions (B) of V/mp- $\text{C}_3\text{N}_4$  samples.

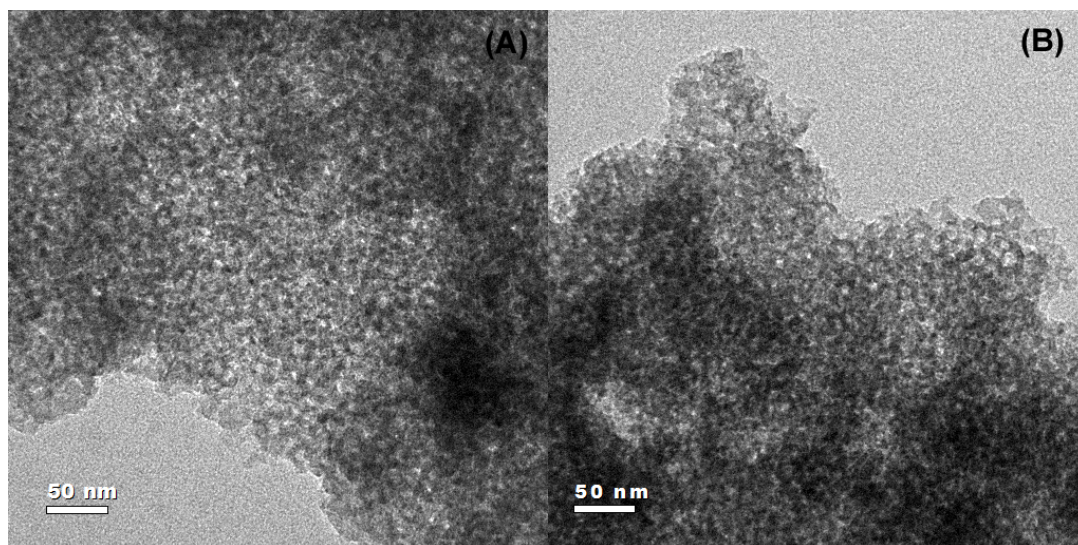

**Fig. S3** TEM images of mp- $\text{C}_3\text{N}_4$  (A) and 10V/mp- $\text{C}_3\text{N}_4$  (B) materials.

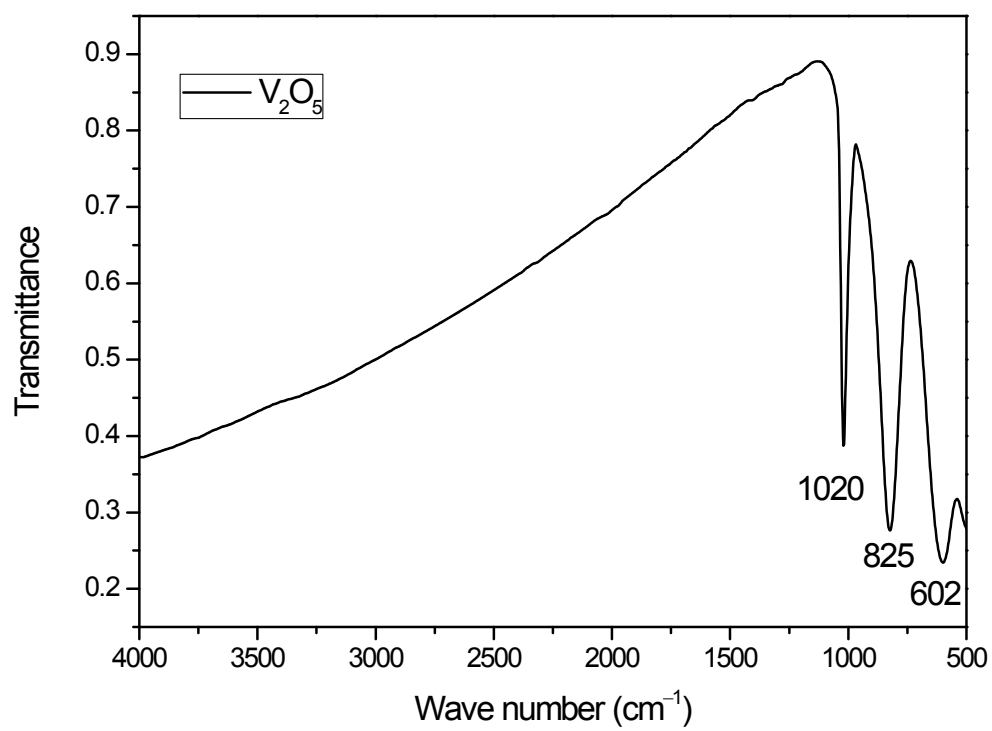

**Fig. S4** FT-IR spectrum of  $V_2O_5$ .

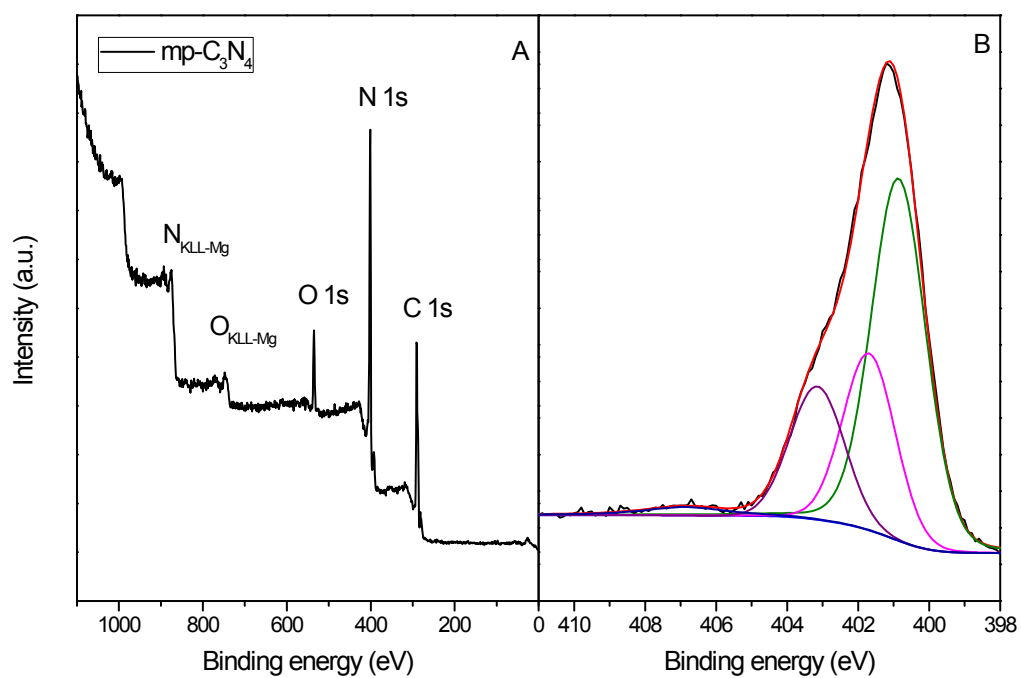

**Fig. S5** XPS survey (A) and N 1s spectrum (B) of mp-C<sub>3</sub>N<sub>4</sub>.

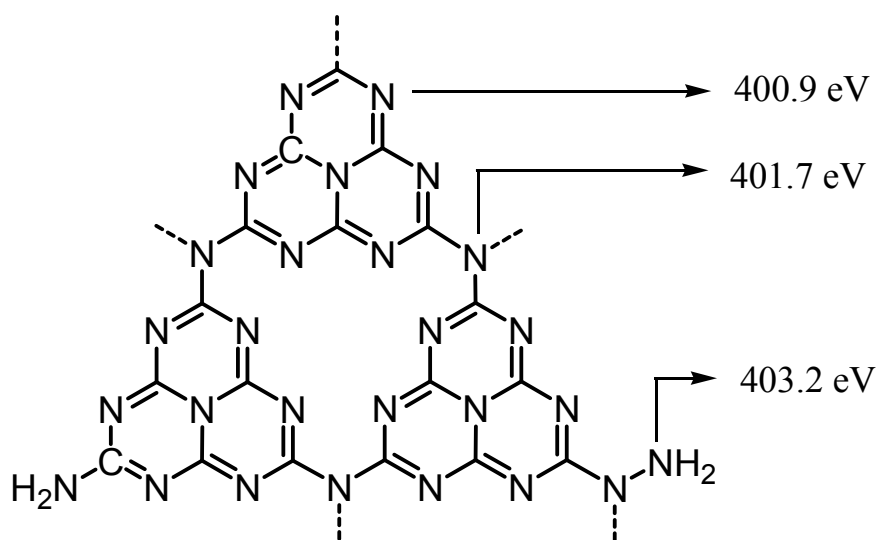

**Scheme S1** Various N species in mp-C<sub>3</sub>N<sub>4</sub>.

**Table S1** Effects of the amounts of benzene and H<sub>2</sub>O<sub>2</sub> catalyst on the catalytic performances on 10V/mp-C<sub>3</sub>N<sub>4</sub><sup>a</sup>.

| Entry | $V_{\text{benzene}}$<br>(mL) | $V_{\text{H}_2\text{O}_2}$<br>(mL) | $n_{\text{H}_2\text{O}_2}/n_{\text{benzene}}$ | $W_{\text{catal.}}$<br>(mg) | Conv.<br>(%) | Sel.<br>(%) | Yield<br>(%) | TOF<br>(h <sup>-1</sup> ) |
|-------|------------------------------|------------------------------------|-----------------------------------------------|-----------------------------|--------------|-------------|--------------|---------------------------|
| 1     | 1                            | 3                                  | 2.6                                           | 60                          | 21.3         | 92.4        | 19.7         | 1.16                      |
| 2     | 1.5                          | 3                                  | 1.8                                           | 60                          | 18.7         | 95.9        | 18.0         | 1.59                      |
| 3     | 2                            | 3                                  | 1.3                                           | 60                          | 10.2         | 97.1        | 9.9          | 1.17                      |
| 4     | 1.5                          | 1                                  | 0.6                                           | 60                          | 2.8          | 97.1        | 2.7          | 0.24                      |
| 5     | 1.5                          | 2                                  | 1.2                                           | 60                          | 10.8         | 96.7        | 10.4         | 0.92                      |

<sup>a</sup> Reaction conditions:  $T = 60\text{ }^{\circ}\text{C}$ ,  $V_{\text{acetonitrile}} = 6.0\text{ mL}$ ,  $t = 3\text{ h}$ , and  $W_{\text{catal.}} = 60\text{ mg}$ .
